# Supplementary material
Source: publisher figshare collection journal article supplement (https://tandf.figshare.com/ndownloader/files/13330109)
Supplement: Supplementary file 1 [file 13330109]

*Table S1. Overview of the reviewed papers: coding types and frequency*

| **Types of Usage** | **Digital competence** | **Digital literacy** |
| --- | --- | --- |
| **1. Mention only** | **3 (11%)** | **27 (34%)** |
|  | Masats and Dooly 2011; Dodge 2013; Garcia-Gutierrez et al. 2017 | Inoue et al. 1997; Jones and Lea 2008; Prendes et al. 2010; Savin-Baden et al. 2010; Lea and Jones 2011; Pinto 2012; Neira-Piñeiro et al. 2013; Osborne et al. 2013; Habib et al. 2014; Kennedy 2014; Liyanagunawardena et al. 2014; Magrino and Sorrell 2014; Scott et al. 2014; Barnes 2015; Brooks 2015; Gourlay 2015; Hori et al. 2015; Kivunja 2015; Murray and Perez 2015; Mar-Molinero and Lewis 2016; Power and Kannara 2016; Schmidt Hanbidge and Sanderson 2016; Smith et al. 2016; Timmis et al. 2016; Fombona et al. 2017; Kelsey and Uytterhoeven 2017; Kolle 2017 |
| **2. Use without defining or reference** | **5 (18%)** | **15 (19%)** |
|  | Biel et al. 2016; Cazco et al. 2016; Roushan et al. 2016; Vazquez-Cano et al. 2016; Barbas et al. 2017 | Powel 2002; Sinka 2006; Braga 2007; Barlow-Jones and van der Westhuizen 2011; Bhatti et al. 2011; McKendry 2012; Alvarez 2013; Buchanan et al. 2013; Mirriah et al. 2015; Altinay et al. 2016; Harper 2016; Peisachovich et al. 2016; Ungerer 2016; Carl and Strydom 2017; Di Lauro and Johinke 2017 |
| **3. Define with reference to policy document** | **9 (32%)** | **8 (10%)** |
|  | Lindroth and Bergquist 2010; Torres-Coronas and Vidal-Blasco 2011; Cinque and Bortoluzzi, 2013; Pérez-Mateo et al. 2014; Mattila 2015; Ribeiro et al. 2015; Torres-Coronas and Vidal-Blasco 2015; Moncada Linares et al. 2016; Guzman-Simon et al. 2017 | Littlejohn et al. 2012; Covey 2013; Istance and Kools 2013; Bell and Secker 2014; Crearie 2016; English 2016; Pates and Sumner 2016; Cronin 2017 |
| **4. Define with reference to research and policy** | **5 (18%)** | **6 (8%)** |
|  | Morellato 2014; Mengual-Andres et al. 2016; Challinor et al. 2017; From 2017; Khan and Bhatti 2017 | Parvathamma and Pattar 2013; Radovanovic et al. 2015; Bancroft 2016; Phuapan et al. 2016; Kuhn 2017; Tuamsuk and Subramaniam 2017 |
| **5. Define with reference to research** | **3 (11%)** | **19 (24%)** |
|  | Scuotto 2013; Tømte et al. 2015; Cazco 2016 | Goodfellow 2011; Kajee and Balfour 2011; Joosten et al. 2012; Machin-Mastromatteo 2012; Gourlayet al. 2013; Hall et al. 2013; Hilton 2013; Tan 2013; Bennett 2014; De Wet 2014; Gachago 2014; Jefferies 2016; Novakovich 2016; Tang and Chaw 2016; Traxler and Lally 2016; Chan et al. 2017; Coldwell-Neilson 2017; Mishra et al. 2017; Roche 2017 |
| **6. Discuss or develop definition** | **3 (11%)** | **4 (5%)** |
|  | Krumsvik 2014; Castaño-Muñoz et al. 2017; Tsankov and Damyanov 2017 | Kenton 2010; Lea 2013; Stewart 2013; Stordy 2015 |
| **Total** | **28** | **79** |
